# Supplementary material for: IL-17 and IFN-γ–producing Respiratory Tissue-Resident Memory CD4 T Cells Persist for Decades in Adults Immunized as Children With Whole-Cell Pertussis Vaccines
Source: PubMed Central journal article supplement (PMC11420794; doi:10.1093/infdis/jiae034), 2024-01-30
Supplement: jiae034_supplementary_data.pdf [file jiae034_supplementary_data.pdf]

**IL-17 and IFN- $\gamma$ -producing respiratory tissue resident memory CD4 T cells persist for decades in adults immunized as children with whole cell pertussis vaccines**

**Karen N McCarthy, Stephen Hone, Rachel M. McLoughlin and Kingston HG Mills**

**Supplementary Data**

**Supplementary Table 1: Demographic characteristics of human donors**

| <b>Baseline characteristic</b>                                 | <b>wP cohort (n= 10)</b>      | <b>aP cohort (n=10)</b>       | <b>p-value</b> |
|----------------------------------------------------------------|-------------------------------|-------------------------------|----------------|
| <b><u>Tonsil cohort</u></b>                                    |                               |                               |                |
| Gender                                                         |                               |                               |                |
| Female                                                         | n=6 (60%)                     | n=7 (70%)                     | 0.6            |
| Male                                                           | n=4 (40%)                     | n=3 (30%)                     |                |
| Age (in years)                                                 |                               |                               |                |
| Median (IQR)                                                   | 30 (27-34)                    | 21 (19-24)                    | <0.001         |
| <b>Indication for Tonsillectomy</b>                            |                               |                               |                |
| Recurrent tonsillitis                                          | 10 (100%)                     | 10 (100%)                     | -              |
| Obstructive sleep apnoea /<br>Tonsillar hypertrophy            | 0                             | 0                             | -              |
| <b>Sample characteristics</b>                                  |                               |                               |                |
| Tonsil sample weight (g)                                       | 7.5 (4.7)                     | 5.8 (5.9)                     | 0.5            |
| Tonsil mononuclear cell yield<br>per gram of tissue (mean, SD) | 33.2 x 10 <sup>6</sup> (57.2) | 33.2 x 10 <sup>6</sup> (47.0) | 0.9            |
| Anti-Pertussis toxin<br>Serum IgG (Median, IQR)                | 11.68 (5-30)                  | 16.23 (9-29)                  | 0.6            |
| <b><u>Nasal cohort</u></b>                                     |                               |                               |                |
| Gender                                                         |                               |                               |                |
| Female                                                         | n=8 (80%)                     | n=9 (90%)                     | 0.55           |
| Male                                                           | n=2 (20%)                     | n=1 (10%)                     |                |
| Age (in years)                                                 |                               |                               |                |
| Median (IQR)                                                   | 32 (30-32)                    | 25.5 (22.7-26.3)              | <0.001         |
| <b>Sample characteristics</b>                                  |                               |                               |                |
| Nasal CD3+ T cell yield per<br>stimulation condition           | 13941 (8374-17474)            | 17225 (8318-21825)            | 0.1            |
| PBMC CD3-depletion purity<br>mean% (SD)                        | 96% (1.72)                    | 95.5% (3.2)                   | 0.37           |
| Anti-Pertussis toxin<br>Serum IgG (Median, IQR)                | 5 (5-9)                       | 5 (5-5)                       | 0.5            |

**Supplementary Table 2: Exclusion criteria**

| <b>Recruitment data</b>                                                                                                                                                                                                                                                                                                                                                                                                                                                                                                                                                                                                                                                                                                                                                                                                                                                                                                                                                                                                                                                                                          |    |
|------------------------------------------------------------------------------------------------------------------------------------------------------------------------------------------------------------------------------------------------------------------------------------------------------------------------------------------------------------------------------------------------------------------------------------------------------------------------------------------------------------------------------------------------------------------------------------------------------------------------------------------------------------------------------------------------------------------------------------------------------------------------------------------------------------------------------------------------------------------------------------------------------------------------------------------------------------------------------------------------------------------------------------------------------------------------------------------------------------------|----|
| <b>Tonsil cohort</b>                                                                                                                                                                                                                                                                                                                                                                                                                                                                                                                                                                                                                                                                                                                                                                                                                                                                                                                                                                                                                                                                                             |    |
| Total number of patients approached                                                                                                                                                                                                                                                                                                                                                                                                                                                                                                                                                                                                                                                                                                                                                                                                                                                                                                                                                                                                                                                                              | 35 |
| Declined to participate                                                                                                                                                                                                                                                                                                                                                                                                                                                                                                                                                                                                                                                                                                                                                                                                                                                                                                                                                                                                                                                                                          | 3  |
| Excluded                                                                                                                                                                                                                                                                                                                                                                                                                                                                                                                                                                                                                                                                                                                                                                                                                                                                                                                                                                                                                                                                                                         | 0  |
| Primary or Secondary immunodeficiency                                                                                                                                                                                                                                                                                                                                                                                                                                                                                                                                                                                                                                                                                                                                                                                                                                                                                                                                                                                                                                                                            | 0  |
| Malignancy                                                                                                                                                                                                                                                                                                                                                                                                                                                                                                                                                                                                                                                                                                                                                                                                                                                                                                                                                                                                                                                                                                       | 1  |
| Tonsil hypertrophy                                                                                                                                                                                                                                                                                                                                                                                                                                                                                                                                                                                                                                                                                                                                                                                                                                                                                                                                                                                                                                                                                               | 2  |
| Receipt of antibiotics <30 days                                                                                                                                                                                                                                                                                                                                                                                                                                                                                                                                                                                                                                                                                                                                                                                                                                                                                                                                                                                                                                                                                  | 1  |
| Prior history of <i>B. pertussis</i> infection                                                                                                                                                                                                                                                                                                                                                                                                                                                                                                                                                                                                                                                                                                                                                                                                                                                                                                                                                                                                                                                                   | 0  |
| Evidence of current <i>B. pertussis</i> infection<br>( <i>B. pertussis</i> PCR positive on nasopharyngeal swab)                                                                                                                                                                                                                                                                                                                                                                                                                                                                                                                                                                                                                                                                                                                                                                                                                                                                                                                                                                                                  | 0  |
| <i>B. pertussis</i> booster <12 months                                                                                                                                                                                                                                                                                                                                                                                                                                                                                                                                                                                                                                                                                                                                                                                                                                                                                                                                                                                                                                                                           | 3  |
| Any vaccination <1 month                                                                                                                                                                                                                                                                                                                                                                                                                                                                                                                                                                                                                                                                                                                                                                                                                                                                                                                                                                                                                                                                                         | 5  |
| Incomplete/Unknown childhood vaccination schedule                                                                                                                                                                                                                                                                                                                                                                                                                                                                                                                                                                                                                                                                                                                                                                                                                                                                                                                                                                                                                                                                | 0  |
| <p>Exclusion criteria included underlying primary or secondary immunodeficiency, malignancy, receipt of antibiotics within 30 days of procedure, tonsil hypertrophy as indication for tonsillectomy, prior history of <i>B. pertussis</i> infection, evidence of current <i>B. pertussis</i> infection via PCR on nasopharyngeal swab at the time of procedure, booster pertussis vaccination in past 12 months or any vaccination in the past 1 month. Participants with an incomplete or unknown childhood immunisation schedule were also excluded. Data were collected from the clinical notes and from the patient including date of birth, gender, procedure and indication, country and year of primary childhood immunisation, additional immunisations or exclusions and current respiratory symptoms were recorded. Where possible patients or parents/guardians were asked to provide vaccination records to confirm vaccination status. Where the original vaccination record was not available, information was collected from the patient including date, location and number of vaccinations.</p> |    |

**Supplementary Table 3: Antibodies and other reagents**

| <b>Antibody</b>                  | <b>Fluorochrome</b>                  | <b>Clone</b> | <b>Supplier</b>                                                                           | <b>Catalogue Number</b> |
|----------------------------------|--------------------------------------|--------------|-------------------------------------------------------------------------------------------|-------------------------|
| <b>Flow cytometry antibodies</b> |                                      |              |                                                                                           |                         |
| Anti-human CD103                 | FITC                                 | Ber-ACT8     | Biolegend                                                                                 | 350203                  |
| Anti-human CD4                   | PerCP e710                           | SK3          | eBiosciences                                                                              | 4320262                 |
| Anti-Human IL-17A                | APC                                  | eBio17B7     | eBiosciences                                                                              | B205752                 |
| Anti-human CD3                   | APC-H7                               | SK7          | eBiosciences                                                                              | 7158521                 |
| Anti-human CD154                 | BV421                                | 24-31        | BioLegend                                                                                 | 310824                  |
| Anti-human IL-13                 | BV421                                | JES10-5A2    | BioLegend                                                                                 | 501916                  |
| Anti-human TCR $\gamma\delta$    | BV421                                | B1           | BioLegend                                                                                 | 331218                  |
| Live/Dead Fixable<br>Aqua        | BV510                                | NA           | Invitrogen                                                                                | 2068285                 |
| Anti-human CD8                   | BV605                                | SK1          | BioLegend                                                                                 | 344741                  |
| Anti-human<br>CD45RO             | BV650                                | UCHL1        | BioLegend                                                                                 | B239721                 |
| Anti-human CCR7                  | PE                                   | G643H7       | BioLegend                                                                                 | B243036                 |
| Anti-human IFN- $\gamma$         | PE-Cy7                               | 4S.B3        | eBiosciences                                                                              | 6145884                 |
| <b>Cytokine secretion assays</b> |                                      |              |                                                                                           |                         |
| Anti-human IFN- $\gamma$         | FITC                                 | -            | Miltenyi<br>Biotech                                                                       | 130-090-433             |
| Anti-human IL-17                 | APC                                  | -            | Miltenyi<br>Biotech                                                                       | 130-094-536             |
| <b>Antigens</b>                  |                                      |              |                                                                                           |                         |
| <b>Antigen</b>                   | <b>Concentration <i>in vitro</i></b> |              | <b>Supplier</b>                                                                           |                         |
| Filamentous Hemagglutinin        | 1 $\mu$ g/ml                         |              | The Native Antigen Company                                                                |                         |
| Staphylococcal Enterotoxin B     | 1 $\mu$ g/mL                         |              | Sigma Aldrich                                                                             |                         |
| Sonicated <i>B. pertussis</i>    | 10 $\mu$ g/mL                        |              | Produced in-house by heat<br>killing and sonicating <i>B.</i><br><i>pertussis</i> (BP338) |                         |

| <b>Other Reagents</b>                       |                                      |                  |
|---------------------------------------------|--------------------------------------|------------------|
| <b>Reagent</b>                              | <b>Concentration <i>in vitro</i></b> | <b>Supplier</b>  |
| Anti-human CD28                             | 1 µg/ml                              | eBioscience      |
| Anti-human CD49d                            | 1 µg/ml                              | eBioscience      |
| Brefeldin A                                 | 5 µg/ml                              | Sigma Aldrich    |
| Monensin                                    | 5 µg/ml                              | BD Golgi Stop    |
| FoxP3 Staining Kit                          | NA                                   | eBioscience      |
| Live/Dead Aqua                              | 1:600 (PBS)                          | ThermoFisher     |
| FACS Compensation Beads                     | 1:10                                 | BD               |
| ArC Amine Reactive Beads                    | NA                                   | ThermoFisher     |
| Human TruStain FcBlock                      | 1:20                                 | BioLegend        |
| Arc Amine Reactive<br>Compensation Bead Kit | NA                                   | Invitrogen       |
| Cytostim                                    | 20 µl/ml                             | Miltenyi-Biotect |

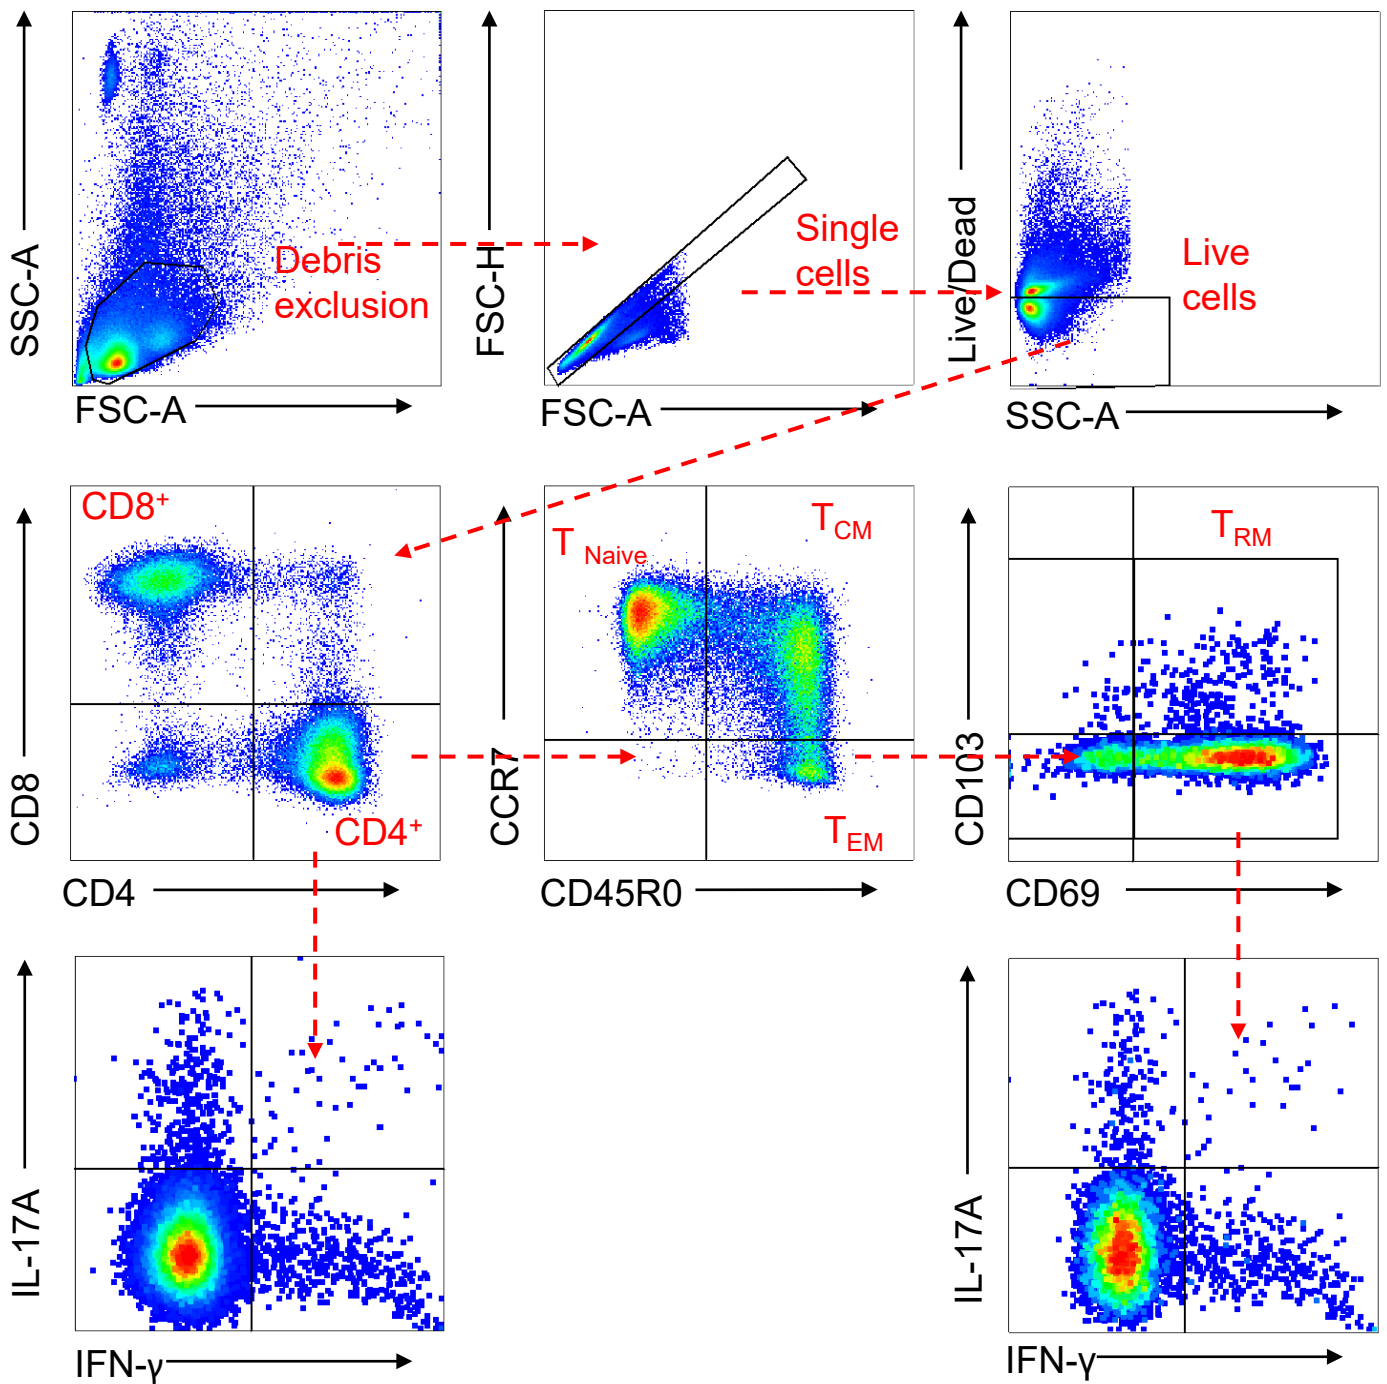

**Supplementary Figure S1. Gating strategy for quantifying cytokine producing tonsil CD4 T cells and CD4 T<sub>RM</sub> cells.**

Lymphocytes were defined by forward scatter (FSC) and side scatter (SSC) density plots based on size and granularity. Doublets were excluded based on SSC-A vs SS-H density plots. Dead cells were excluded based on Live/Dead Fixable Aqua staining. CD4<sup>+</sup> T cells were identified by positive staining for CD4. Effector memory T (T<sub>EM</sub>) cells were identified based on positive staining for CD45RO and CCR7<sup>low</sup>. T<sub>RM</sub> cells were defined based on expression of CD69 with or without co-expression of CD103. Cytokine producing cells were identified via intracellular cytokine staining. Fluorescence minus one (FMO) controls were used to define positive and negative populations.

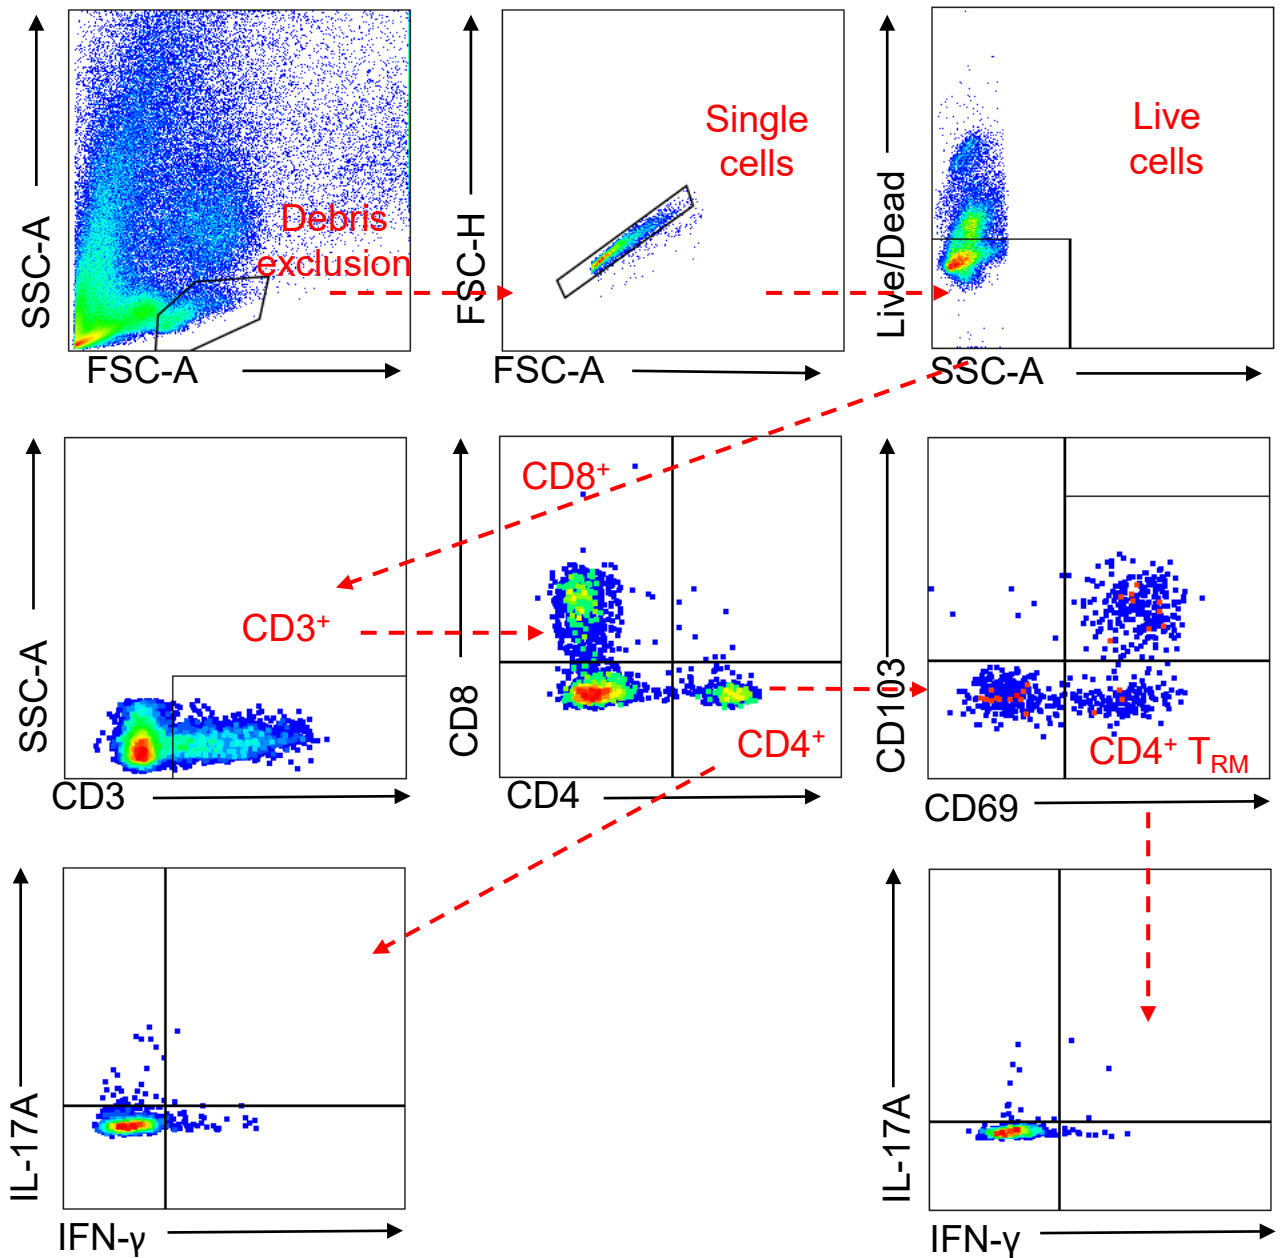

**Supplementary Figure S2. Gating strategy for quantifying cytokine producing CD4 T cells and CD4 T<sub>RM</sub> cells in nasal tissue samples.**

Lymphocytes were defined by forward scatter (FSC) and side scatter (SSC) density plots based on size and granularity. Doublets were excluded based on SSC-A vs SS-H density plots. Dead cells were excluded based on Live/Dead Fixable Aqua staining. CD3<sup>+</sup> T cells were identified based on positive staining for CD3. CD4<sup>+</sup> cells identified by positive staining CD4 and negative staining for CD8. T<sub>RM</sub> cells were defined based on expression of CD69 with or without co-expression of CD103. Cytokine producing cells were identified via cytokine secretion assay. Fluorescence minus one (FMO) controls were used to define positive and negative populations.
